# Supplementary material for: Supramolecular glycopolymers with thermo-responsive self-assembly and lectin binding
Source: Royal Society of Chemistry journal article supplement (doi:10.1039/c5py00939a), 2015-01-01
Supplement: c5py00939a1.pdf [file c5py00939a1.pdf]

## **SUPPLEMENTARY INFORMATION**

# **Supramolecular Glycopolymers with Thermo-Responsive Self-Assembly and Lectin Binding**

Nese Cakir<sup>1,2</sup>, Gurkan Hizal<sup>2</sup>, Remzi Becer<sup>1\*</sup>

<sup>1</sup>School of Engineering and Materials Science, Queen Mary University of London, Mile End Road, E1 4NS London, United Kingdom

<sup>2</sup>Department of Polymer Science and Technology, Istanbul Technical University, 34469 Maslak, Istanbul, Turkey

Corresponding author: [r.becer@qmul.ac.uk](mailto:r.becer@qmul.ac.uk)

### **Content:**

#### A. Experimental procedures

- A.1. Chemicals
- A.2. Synthesis of Monoazide functional Cyclodextrin
- A.3. Synthesis of Heptaazide functional Cyclodextrin
- A.4. Synthesis of 1-(2'-Propargyl) D-Mannose
- A.5. Synthesis of monosubstituted cyclodextrin-based mannose via CuAAC (CD<sub>1</sub>)
- A.6. Synthesis of persubstituted cyclodextrin-based mannose via CuAAC (CD<sub>7</sub>)
- A.7. Synthesis of adamantane acrylate monomer
- A.8. Triblock Copolymer Preparation by Iterative Reversible Addition-Fragmentation Chain Transfer (RAFT) Polymerization
- A.9. Supramolecular interaction and self-assembly of micelles
- A.10. Sugar lectin interaction

#### B. Measurements and analysis

#### C. Additional data and Figures

## A. Experimental procedures:

### A.1. Chemicals.

$\beta$ -Cyclodextrin ( $\beta$ -CD; Sigma-Aldrich, 97%) was recrystallized twice from water and dried in a vacuum oven at 100 °C for two days before use. 2,2'-azobis(isobutyronitrile) (AIBN; Fluka, 99%) was purified by recrystallization twice from methanol. *N*-isopropylacrylamide (NIPAAm; Sigma-Aldrich,  $\geq 99\%$ ) was recrystallized from hexane and *N,N*-Dimethylacrylamide (DMAAm; Sigma-Aldrich, 99%) was passed over a short column of basic alumina prior to use. Copper (I) Bromide (CuBr; Sigma-Aldrich, 98%) was washed sequentially with acetic acid and ethanol and dried under vacuum. H<sub>2</sub>SO<sub>4</sub>-silica catalyst was prepared according to the literature procedure<sup>1</sup>. The RAFT agent, 2-(((dodecylthio)carbonothioyl)thio)propan-2-yl pentanoate, kindly provided by Lubrizol. Sodium methoxide (CH<sub>3</sub>ONa; Sigma-Aldrich, 25 wt. % in methanol), triphenylphosphine (Ph<sub>3</sub>P; Sigma-Aldrich,  $\geq 95.0\%$ ), *N*-bromosuccinimide (NBS, Sigma-Aldrich, 99%), *p*-toluenesulfonyl chloride (TsCl; Sigma-Aldrich,  $\geq 99\%$ ), sodium azide (NaN<sub>3</sub>; Sigma-Aldrich,  $\geq 99.5\%$ ), propargyl alcohol (Sigma-Aldrich, 99%), triethylamine (Et<sub>3</sub>N; Acros, 99%), acryloyl chloride (Sigma-Aldrich, 97%), Concanavalin A (Con A; Sigma-Aldrich), tris[2-(dimethylamino)ethyl]amine (Me<sub>6</sub>TREN; Sigma-Aldrich, 97%), Methyl  $\alpha$ -D-mannopyranoside (Sigma-Aldrich,  $\geq 99\%$ ), and D-(+)-mannose (Sigma-Aldrich,  $\geq 99\%$ ), were used as received. All chemicals were used as received unless stated otherwise. All solvents used were of analytical grade, except DMSO and dioxane. Distilled water from Ultrapure was used throughout this work.

### A.2. Synthesis of Monoazide functional Cyclodextrin.<sup>2</sup>

#### A.2.1. Synthesis of Mono-6-deoxy-6-(*p*-tolylsulfonyl)- $\beta$ -cyclodextrin ( $\beta$ -CD-OTs).

Based on a literature procedure, in a 500 mL round bottom flask  $\beta$ -cyclodextrin (20.0 g, 17.6 mmol) was suspended in 250 mL 0.4 M sodium hydroxide (NaOH) aqueous solution. The flask was cooled to 0°C in ice bath. TsCl (13.4 g, 70.3 mmol) was added in slow portions over 10 min. After 45 min

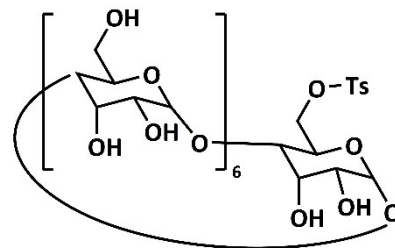

of stirring at 0°C, the precipitate was removed by filtration and the pH of the filtrate was adjusted to 8.5 by dropping HCl aqueous solution. Then the mixture was stirred for 1 h at room temperature. The resulting white precipitate was recovered by filtration and washed three times with water. The final product was dried in a vacuum oven at 60°C, yielding a white solid (8.8

g, yield: 40%).  $^1\text{H}$  NMR (DMSO- $d_6$ ):  $\delta$  7.76 (d,  $J$ = 8.3 Hz, 2H, H-7), 7.45 (d,  $J$ = 8.2 Hz, 2H, H-8), 5.69 (br, 14H, OH-2,3), 4.83 (t, 5H, H-1), 4.77 (t, 2H, H-1), 4.47 (d,  $J$ = 26.3 Hz, 6H, OH-6), 4.37 (br, 2H, H-6'), 4.35 (br, 1H, H-5'), 3.81-3.08 (br, 26H, H-2,3,4,5,6 overlap with  $\text{H}_2\text{O}$ ), 2.43 (s, 3H, H-9). FT-IR v: 3316 (OH), 2924 (CH), 2160 (CH), 2030, 1358 (S=O), 1152 (S-O), 1077 (OH), 1023 (CH), 945, 841, 756 (OH), 684 (CH)  $\text{cm}^{-1}$ . ESI-MS:  $m/z$  1312.2 [ $\text{M} + \text{Na}^+$ ].

### A.2.2. Synthesis of Mono-6-deoxy-6-azido- $\beta$ -cyclodextrin ( $\beta$ -CD- $\text{N}_3$ ).

$\beta$ -CD-OTs (8.0 g, 6.2 mmol) was suspended in 100 mL water. After heating to  $80^\circ\text{C}$ ,  $\text{NaN}_3$  (2.0 g, 31.0 mmol) was added. The reaction mixture was stirred at  $80^\circ\text{C}$  for overnight. The reaction solution was cooled to room temperature and precipitated in 800 mL acetone. The resulting white precipitate was recovered by filtration and redissolved in 50 mL of water and precipitated again

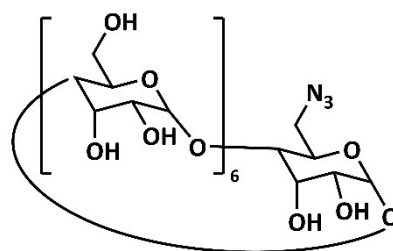

in acetone. The white solid was dried under vacuum at  $60^\circ\text{C}$  for 2 days (6.8 g, yield: 95%).  $^1\text{H}$  NMR (DMSO- $d_6$ ):  $\delta$  5.72 (br, 14H, OH-2,3), 4.88 (s, H, H-1), 4.83 (d, 6H, H-1), 4.57-4.40 (br, 6H, OH-6), 3.86-3.50 (br, 28H, H-3,5,6,6'), 3.32 (br, 14H, H-2,4 overlap with  $\text{H}_2\text{O}$ ). FT-IR v: 3316 (OH), 2924 (CH), 2160 (C-C), 2102 (N=N), 1644 (C=C), 1364 (OH), 1152 (CN), 1077 (OH), 1025 (CH), 945, 853, 756 (NH), 704 (CH)  $\text{cm}^{-1}$ . ESI-MS:  $m/z$  1182.3 [ $\text{M} + \text{Na}^+$ ].

### A.3. Synthesis of Heptaazide functional Cyclodextrin.<sup>3</sup>

#### A.3.1. Synthesis of Heptakis-(6-deoxy-6-bromine)- $\beta$ -cyclodextrin ( $\beta$ -CD-(Br) $_7$ )

Based on a literature procedure, in a 500 mL round bottom flask  $\text{Ph}_3\text{P}$  (16.2 g, 61.7 mmol) was dissolved in anhydrous DMF (60 mL). The flask was cooled to  $0^\circ\text{C}$  in ice bath. NBS (11.0 g, 61.7 mmol) was dissolved in anhydrous DMF (20 mL) and added dropwise to  $\text{Ph}_3\text{P}$  solution and stirred 30 min. at room temperature.  $\beta$ -CD (5.0 g, 4.4

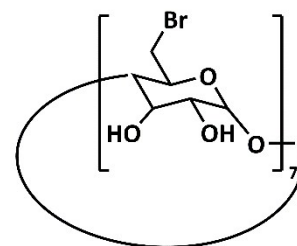

mmol) was dissolved in anhydrous DMF (60 mL) and added dropwise to  $\text{Ph}_3\text{P}$ /NBS solution under  $\text{N}_2$  atmosphere. Reaction temperature was maintained at  $80^\circ\text{C}$  for overnight. The reaction mixture was then cooled to  $-15^\circ\text{C}$  and the pH was adjusted to 9 with sodium methoxide (5.4 M in methanol), while stirring for further 1 h. It was then poured into stirred ice-water (1 L) resulting in the formation of a precipitate which was filtered, washed with MeOH, obtained as white solids and dried under vacuum for 2 days (5.2 g, 75%).  $^1\text{H}$  NMR (DMSO- $d_6$ ):  $\delta$  6.01 (d,  $J$ =6.6 Hz, 7H, OH-2), 5.88 (d,  $J$ =2.1 Hz, 7H, OH-3), 4.98 (d,  $J$ =3.4 Hz, 7H, H-1), 4.00

(d,  $J=9.6$  Hz, 7H, H-6a), 3.82 (t,  $J=9.4$  Hz, 7H, H-5), 3.72-3.54 (m, 14H, H-3, H-6'), 3.46-3.29 (m, 14H, H-2, H-4, overlap with H<sub>2</sub>O). FT-IR  $\nu$ : 3334(OH); 2916 (CH)  $\text{cm}^{-1}$ .

### A.3.2. Synthesis of Heptakis-(6-deoxy-6-azido)- $\beta$ -cyclodextrin ( $\beta$ -CD-(N<sub>3</sub>)<sub>7</sub>)

$\beta$ -CD-(Br)<sub>7</sub> (4.7 g, 3.0 mmol) was dissolved in anhydrous DMF (20 ml) and NaN<sub>3</sub> (2.7 g, 41.8 mmol) was added. The resulting suspension was stirred at 70 °C under N<sub>2</sub> atmosphere for 24h. The reaction solution was cooled to room temperature and precipitated in 600 mL water. The precipitate was filtered and washed two times with water. The obtained white powder was dried under vacuum at ambient temperature for 24 h (3.5 g, 90%). <sup>1</sup>H NMR (DMSO-*d*<sub>6</sub>):  $\delta$  5.88 (d,  $J=6.8$  Hz, 7H, OH-2), 5.75 (d,  $J=2.1$  Hz, 7H, OH-3), 4.90 (d,  $J=3.5$  Hz, 7H, H-1), 3.91-3.67 (m, 14H, H-5, H-6), 3.65-3.50 (m, 14H, H-3, H-6'), 3.45-3.25 (m, 14H, H-2, H-4, overlap with H<sub>2</sub>O). FT-IR  $\nu$ : 3334(OH); 2922 (CH); 2098 (N<sub>3</sub>)  $\text{cm}^{-1}$ .

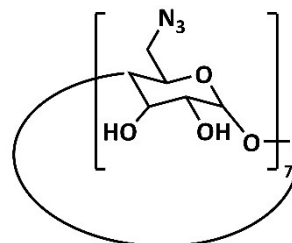

### A.4. Synthesis of 1-(2'-Propargyl) D-Mannose

Based on a literature procedure,<sup>4</sup> the solution of D-mannose (6.0 g, 33.4 mmol), propargyl alcohol (9.7 mL, 166.5 mmol) and H<sub>2</sub>SO<sub>4</sub>-silica (166 mg) was stirred at 65 °C for overnight. After cooling to room temperature, reaction mixture was transferred to

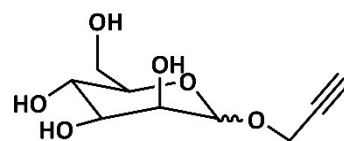

a silica gel column and eluted with CHCl<sub>3</sub>-MeOH (8:1) to remove the excess propargyl alcohol. The product was obtained as white solid after drying under vacuum (1.8 g, yield: 57%).

FT-IR  $\nu$ : 3347 (OH), 3285 (C $\equiv$ C-H), 2118 (C $\equiv$ C)  $\text{cm}^{-1}$ . ESI-MS:  $m/z$  241.2 [M + Na<sup>+</sup>].

For detailed characterization, a part of the product was per-*O*-acetylated using acetic anhydride (8 equiv) and catalytic H<sub>2</sub>SO<sub>4</sub>-silica. <sup>1</sup>H NMR spectroscopy of the per-*O*-acetylated product revealed formation of the desired glycoside in a 6:1 ( $\alpha/\beta$ ) ratio. <sup>1</sup>H NMR (CDCl<sub>3</sub>):  $\delta$  5.32 (dd,  $J=3.3$ , 1H, H-3), 5.30-5.25 (m, 2H, H-2, H-4), 5.02 (s, 1H, H-1), 4.28 (dd,  $J=5.2$ , 1H, H-6a), 4.27 (d,  $J=2.4$  Hz, 2H, CH<sub>2</sub>-C $\equiv$ CH), 4.10 (dd,  $J=2.5$  Hz, 1H, H-6b), 4.04-3.98 (m, 1H, H-5), 2.47 (t, 1H, CH<sub>2</sub>-C $\equiv$ CH), 2.16, 2.10, 2.03, 1.98 (4s, 12H, 4 x COCH<sub>3</sub>).

### A.5. Synthesis of monosubstituted cyclodextrin-based mannose via CuAAC (CD<sub>1</sub>)

$\beta$ -CD-N<sub>3</sub> (1.0 g, 0.86 mmol), 1-(2'-Propargyl) D-Mannose (0.4 g, 1.72 mmol,  $\alpha/\beta=6/1$ ) were dissolved in DMSO (5 mL) in a Schlenk tube. Me<sub>6</sub>TREN (230  $\mu$ L, 0.86 mmol) and CuBr (0.12 g, 0.86 mmol) were added, and the reaction mixture was evacuated and filled with nitrogen, then stirred at 50 °C for 24 h. When the reaction was completed, it was precipitated into methanol (no need to remove the DMSO), filtered and upper solution concentrated under reduced pressure and precipitated again into methanol. All precipitates were

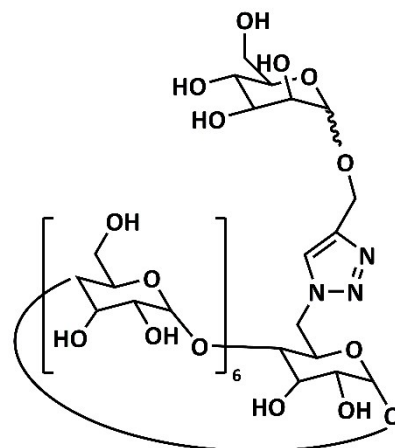

carefully collected, washed with methanol and dissolved in water, cuprisorb (copper chelating agent from Seachem Laboratories) was added into the solution and stirred overnight. After that the clear solution was separated from cuprisorb via filter for freeze drying (Yield= 0.8 g, 67%). <sup>1</sup>H NMR (DMSO-*d*<sub>6</sub>):  $\delta$  7.95 (s, 1H, NCH=C), 6.10-5.85 (m, 14H, OH-2, 3 of CD), 5.10 (s, 7H, H-1), 4.99-3.00 (m, CD & mannose residues, overlap with H<sub>2</sub>O). FT-IR v: 3351 (OH), 2927 (CH), 1331 (OH), 1153 (C-N), 1078 (OH), 1026 (CH), 946 (C=C) cm<sup>-1</sup>.

#### A.6. Synthesis of persubstituted cyclodextrin-based mannose via CuAAC (CD<sub>7</sub>)

$\beta$ -CD-(N<sub>3</sub>)<sub>7</sub> (0.3 g, 0.23 mmol), 1-(2'-Propargyl) D-Mannose (1.0 g, 4.81 mmol,  $\alpha/\beta=6/1$ ) were dissolved in DMSO (2 mL) in a Schlenk tube. Me<sub>6</sub>TREN (429  $\mu$ L, 1.61 mmol) and CuBr (0.23 g, 1.61 mmol) were added, and the reaction mixture was evacuated and filled with nitrogen, then stirred at 50 °C for 24 h. When the reaction was completed, it was precipitated into methanol. When the reaction was completed, due to low amount of DMSO, solvent wasn't removed from reaction medium. It was precipitated into methanol, filtered and upper solution concentrated under reduced pressure and precipitated again into methanol. All precipitates were carefully collected and

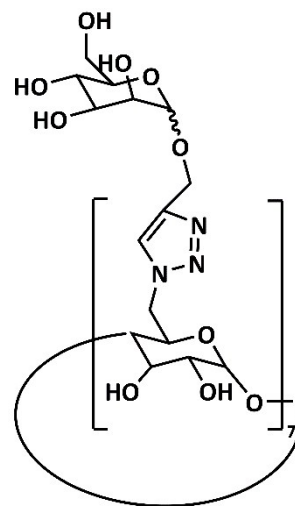

dissolved in water, cuprisorb (copper chelating agent from Seachem Laboratories) was added into the solution and stirred overnight. After that the clear solution was separated from cuprisorb via filter for freeze drying (Yield= 0.44 g, 69%). <sup>1</sup>H NMR (DMSO-*d*<sub>6</sub>):  $\delta$  7.95 (s, 7H, NCH=C), 6.12-5.84 (m, 14H, OH-2, 3 of CD), 5.11 (s, 7H, H-1), 4.98-3.00 (m, CD & mannose residues, overlap with H<sub>2</sub>O). FT-IR v: 3326 (OH), 2910 (CH), 1261 (OH), 1150 (C-N), 1075 (OH), 1027 (CH), 950 (C=C) cm<sup>-1</sup>.

### A.7. Synthesis of adamantane acrylate monomer

1-Adamantane methanol (3.0 g, 18.0 mmol) as dissolved in 80 mL of THF and Et<sub>3</sub>N (6.3 mL, 45.0 mmol) was added. The reaction mixture was then cooled to 0 °C. Acryloyl chloride (1.7 mL, 21.6 mmol) in THF (20 mL) was added dropwise within 30 minutes. The reaction mixture was stirred for 15 min. at 0 °C then over night at room temperature. The reaction was filtered off, solvent evaporated and was added CH<sub>2</sub>Cl<sub>2</sub>, then extracted with HCl (1 M, 2×30 mL), deionized water (2×30 mL) in sequence. After removing the solvents by a rotary evaporator, the crude product was purified by column chromatography over silica gel eluting with hexane/EtOAc (9/1). (Yield=2.9 g, 73%). <sup>1</sup>H NMR (CDCl<sub>3</sub>): δ 6.33 (d, *J* = 16.9 Hz, 1H, H-c), 6.06 (dd, *J* = 17.3 Hz, 1H, H-b), 5.74 (d, *J* = 10.4 Hz, 1H, H-c'), 3.89 (s, 2H, H-a) 1.92 (m, 3H, H-e), 1.70 and 1.65 (d, 6H, H-d), 1.60 (d, 6H, H-d').

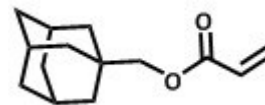

**A.8. Triblock Copolymer Preparation by Iterative Reversible Addition–Fragmentation Chain Transfer (RAFT) Polymerization. Typical Synthesis of the First Block.** Chain transfer agent (CTA), monomer(s), initiator and solvent are introduced in a flask equipped with a magnetic stirrer and sealed with a rubber septum (Table S2 for the quantity of reagents needed for the triblock copolymer). The flask is degassed by bubbling argon through the solution for 15 min, then the RAFT polymerization is performed in a thermostated oil bath at 65 °C and removed after nearly full monomer conversion. The tube was subsequently cooled with liquid nitrogen to stop the reaction. The residue was precipitated in hexane. During polymerization samples are withdrawn from the polymerization medium using a degassed syringe for GC instrument for monitor monomer conversions. Before each new block, a sample is withdrawn from the polymerization medium using a degassed syringe for <sup>1</sup>H NMR and SEC analysis.

**Typical Synthesis of the Following Blocks.** For the iterative chain extension, a further mixture of degassed monomer, initiator and solvent is added via gastight syringe to the polymerization medium and the polymerization mixture is allowed to polymerize at the same temperature for desired time with stirring (Table S2 for the quantity of reagents needed for the triblock copolymer). Importantly, the amount of initiator remaining after each cycle is taken into account for the following blocks.

### A.9. Supramolecular interaction and self-assembly of micelles.

The Solutions of **P1** triblock copolymer and CD derivatives dissolved in Milli-Q water at an 1 mg.mL<sup>-1</sup> concentration. After waiting a sufficient time period to allow for complex formation

(approx.30 min), the solutions were filtered with 0.2 $\mu$ m regenerated cellulose syringe filter (Roth, Rotilabo) to remove the particle impurities and placed in a microquartz cuvette. The cuvette was placed in a dynamic light scattering (DLS) particle size analyzer. Every measurement was performed at least five times both 10 °C and 40 °C. The change of the average particles diameters or mean count rate vs temperature was then observed. For the temperature sequenced measurements the sample was equilibrated at the specific temperature for 3 minutes, then the DLS measurement was performed 2 times for 5 minutes and the temperature changed again. The entire procedure was performed 2 times and the data points were finally averaged. All hydrodynamic diameters ( $D_h$ ) in the text are the averages of the number weighted distributions.

#### **A.10. Sugar lectin interaction**

All experiments were conducted with HEPES-buffered saline (HBS) (0.10 M HEPES, 0.9 M NaCl, 1 mM MgCl<sub>2</sub>, 1 mM CaCl<sub>2</sub>, and 1 mM MnCl<sub>2</sub> adjusted to pH 7.4 and filtered with 0.2 $\mu$ m regenerated cellulose syringe filter.

##### ***Turbidimetry Assay***

Sugar-lectin binding activities were investigated by the increasing absorbance at  $\lambda=420$  nm after addition of glycomacromolecule to a concentrated Con A solution. A solution of 40  $\mu$ M ConA in HBS buffer solution was made fresh before the assay. The exact concentration of Con A was determined by measuring the absorbance at 280 nm ( $A_{280} = 1.37 \times [\text{mg/mL Con A}]$ ). Turbidity measurements were performed by adding 350  $\mu$ L of the ConA solution to a dry quartz microcuvette (700  $\mu$ l, 1 cm pathlength) and put into the holder of UV-visible spectrophotometry at a certain temperature for 1 min. A solution of the ligand in HBS buffer was then added (350  $\mu$ L at 320 $\mu$ M of the polymer with CD derivatives). Upon addition, the solution was mixed vigorously for 5 s using a pipette. Absorbance data were recorded at 420 nm for 15 min at 1.2 Hz.

##### ***Competitive binding to 1-methyl-D-mannopyranoside***

After conjugation of polymer with CD derivatives with ConA, 30  $\mu$ L of 5 mg.ml<sup>-1</sup> 1-methyl-D-mannopyranoside were added and the absorbance was recorded over 15 min at 40 °C.

##### ***Quantitative Precipitation Assay***

Con A was dissolved in the HBS buffer solution to make fresh stock solution and the concentration was 60  $\mu$ M (assuming Con A tetramers with a molecular weight of 104 kDa.)

Polymer with CD derivative solutions in HBS buffer (512  $\mu\text{M}$ ) were also prepared with a series of different concentration. Then Con A solution and the glycopolymer solution were mixed (1:1, v/v) energetically and incubated for 5 h at 40 °C. So the final concentration of Con A was 30  $\mu\text{M}$ . White precipitates were separated from solution by centrifugation at 5000  $\times g$  for 5 min, followed by removal of the supernatants very carefully using pipette. Then the pellets were resuspended in cold buffer again. These washing steps were repeated twice. After removal of the supernatants, the precipitates were dissolved in a HBS buffer solution of methyl- $\alpha$ -D-mannopyranoside (1 mL, 100 mM). With complete dissolution, the Con A content was determined by measuring the absorbance at 280 nm.

## **B. Measurements and analysis:**

**Size exclusion chromatography (SEC).** Gel permeation chromatography was used to determine the molecular weight and molecular weight distribution of polymers. A Varian 390-LC system in DMF (1 g/L LiBr) at 50 °C, equipped with refractive index and viscometry detectors, 2  $\times$  PLgel 5 mm mixed-D columns (300  $\times$  7.5 mm), 1  $\times$  PLgel 5 mm guard column (50  $\times$  7.5 mm) and autosampler. Narrow linear poly (methyl methacrylate) standards in range of 200 to  $1.0 \times 10^6$  g $\cdot\text{mol}^{-1}$  were used to calibrate the system. All samples were passed through 0.45  $\mu\text{m}$  PTFE filter before analysis.

**Nuclear Magnetic Resonance (NMR) spectroscopy.**  $^1\text{H}$  NMR spectra were recorded using a Bruker Avance 400 spectrometer (400 MHz); samples were analyzed in  $\text{CDCl}_3$  and  $\text{DMSO-d}_6$  at 25°C. 2D NOESY (nuclear Overhauser enhancement spectroscopy) were performed on a Bruker AV600 (IconNMR) spectrometer at both room temperature and 70°C.

**FT-IR Spectroscopy.** The FT-IR spectra were recorded on a Bruker FT-IR spectrometer TENSOR II with Diamond-ATR module. The scanning range was 600-4000  $\text{cm}^{-1}$  and the resolution was 1  $\text{cm}^{-1}$ .

**Electrospray ionization-mass spectrometry (ESI-MS).** Mass spectra were recorded on a Thermo Finnigan LCQ Decaquadropole ion trap mass spectrometer (Thermo Finnigan, San Jose, CA), equipped with an atmospheric pressure ionization source operating in the nebulizer assisted electrospray mode and was used in positive ion mode.



**Dynamic light scattering (DLS).** Dynamic light scattering (DLS) measurements were carried out in a Malvern Instrument Nano ZS using a He-Ne laser with a 633 nm wavelength, at an angle of 173°.

**UV-visible spectrophotometry.** UV-visible spectra were recorded on a PerkinElmer Lamda 25 UV/VIS spectrometer equipped with a (PTP-1) temperature control unit at a certain temperatures in the range of 200 nm and 600 nm using quartz microcuvettes.

### C. Additional data and Figures:

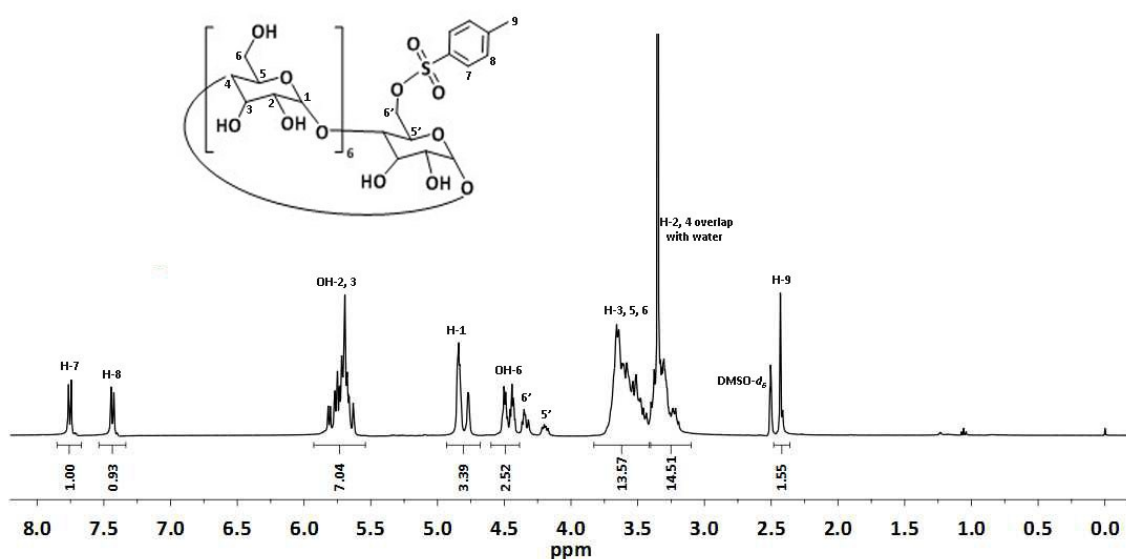

**Figure S1.**  $^1\text{H}$  NMR spectrum of  $\beta$ -CD-OTs in  $\text{DMSO-}d_6$  at room temperature.

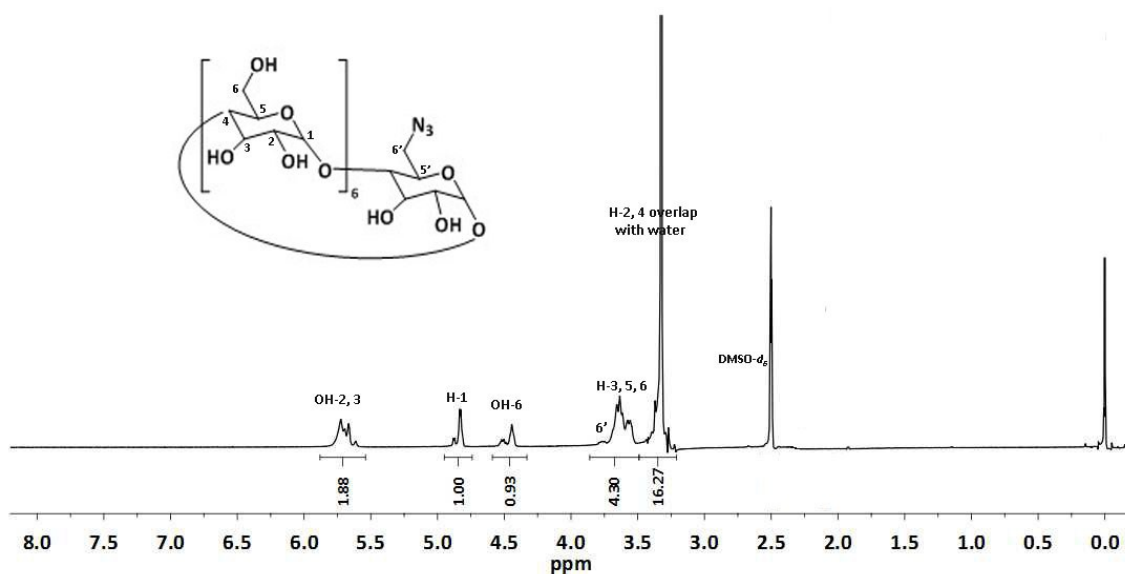

**Figure S2.**  $^1\text{H}$  NMR spectrum of  $\beta$ -CD- $\text{N}_3$  in  $\text{DMSO-}d_6$  at room temperature.

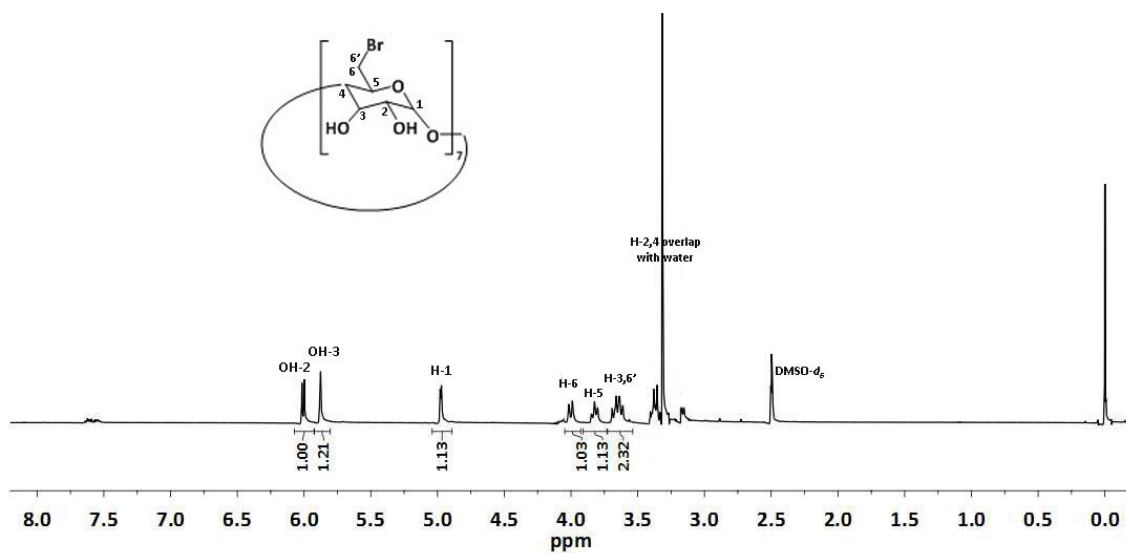

**Figure S3.** <sup>1</sup>H NMR spectrum of  $\beta$ -CD-(Br)<sub>7</sub> in DMSO-*d*<sub>6</sub> at room temperature.

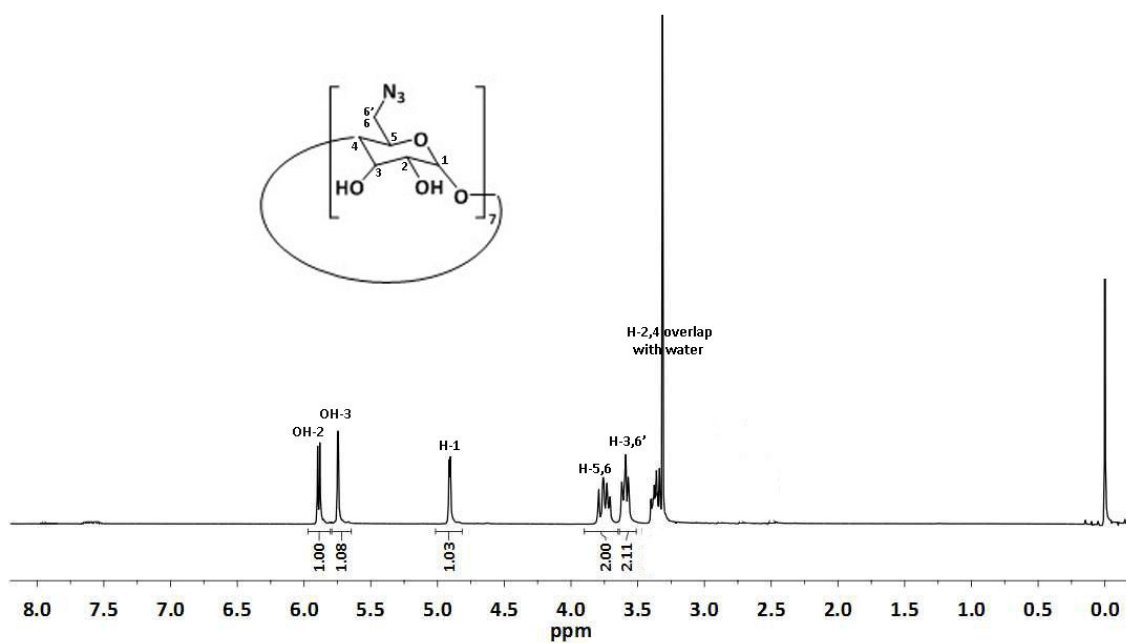

**Figure S4.** <sup>1</sup>H NMR spectrum of  $\beta$ -CD-(N<sub>3</sub>)<sub>7</sub> in DMSO-*d*<sub>6</sub> at room temperature.

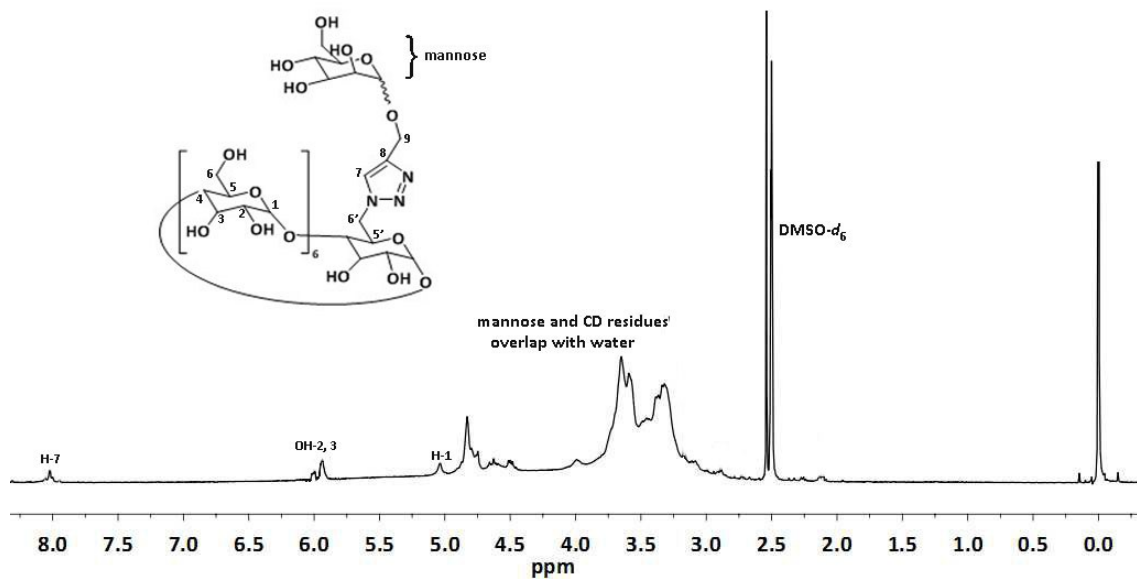

**Figure S5.**  $^1\text{H}$  NMR spectrum of  $\beta$ -CD-Mannose ( $\text{CD}_1$ ) in  $\text{DMSO-}d_6$  at room temperature.

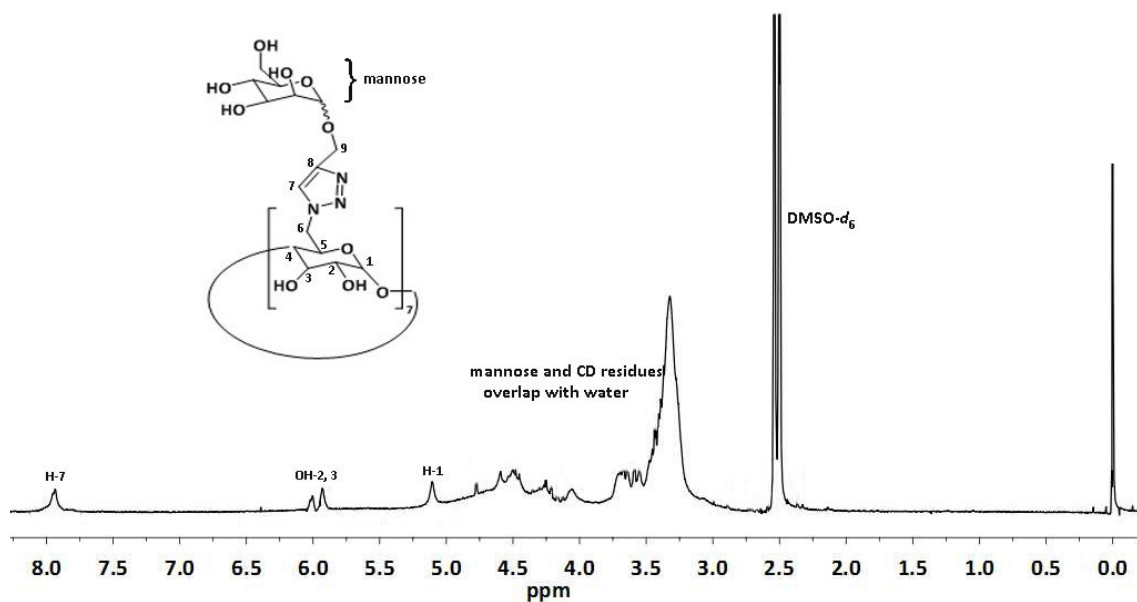

**Figure S6.**  $^1\text{H}$  NMR spectrum of  $\beta$ -CD-(Mannose) $_7$  ( $\text{CD}_7$ ) in  $\text{DMSO-}d_6$  at room temperature.

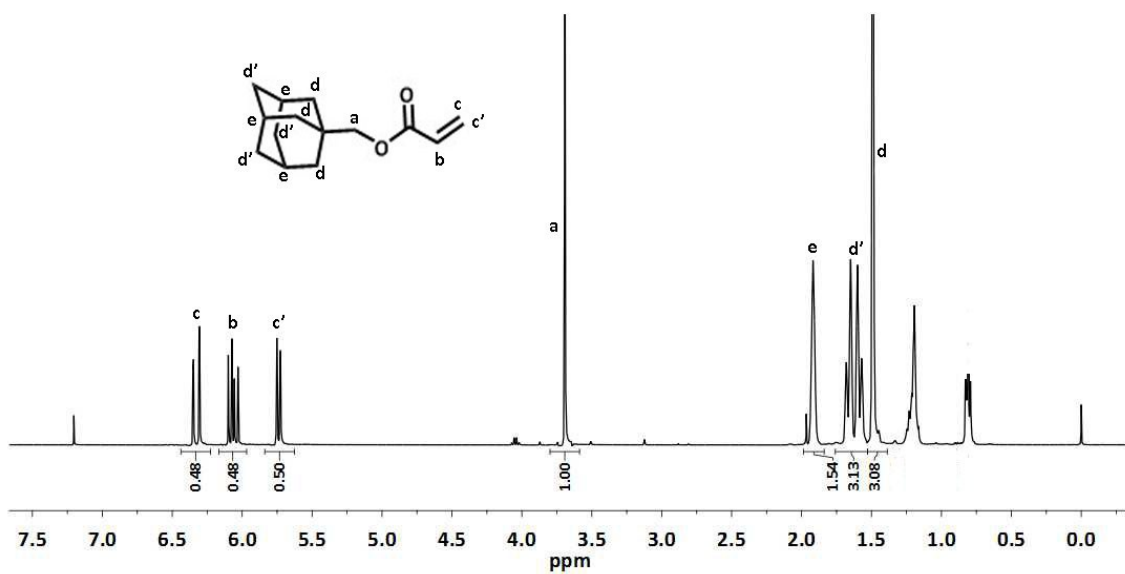

**Figure S7.** <sup>1</sup>H NMR spectrum of adamantane acrylate monomer in CDCl<sub>3</sub> at room temperature.

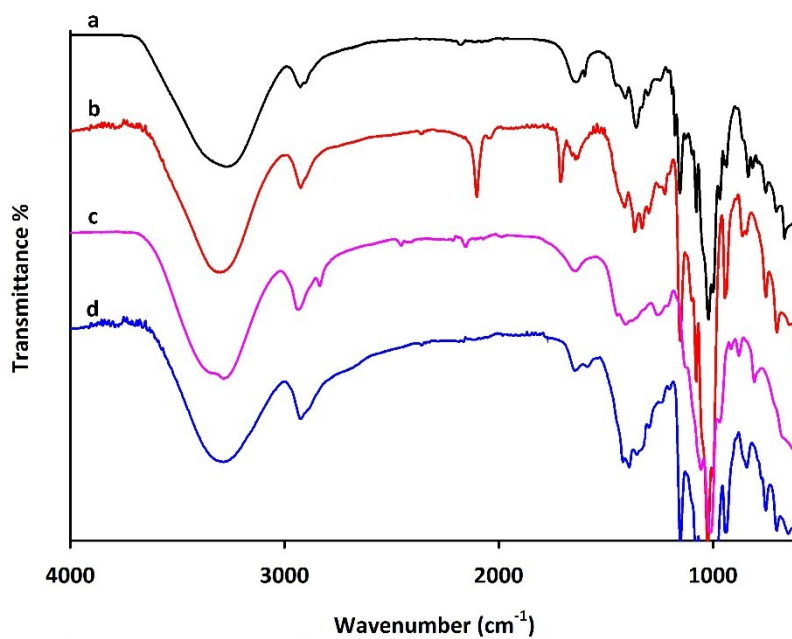

**Figure S8.** FTIR spectra of (a)  $\beta$ -CD-OTs (b)  $\beta$ -CD-N<sub>3</sub> (c) 1-(2'-Propargyl) D-Mannose and (d)  $\beta$ -CD-Mannose (CD<sub>1</sub>).

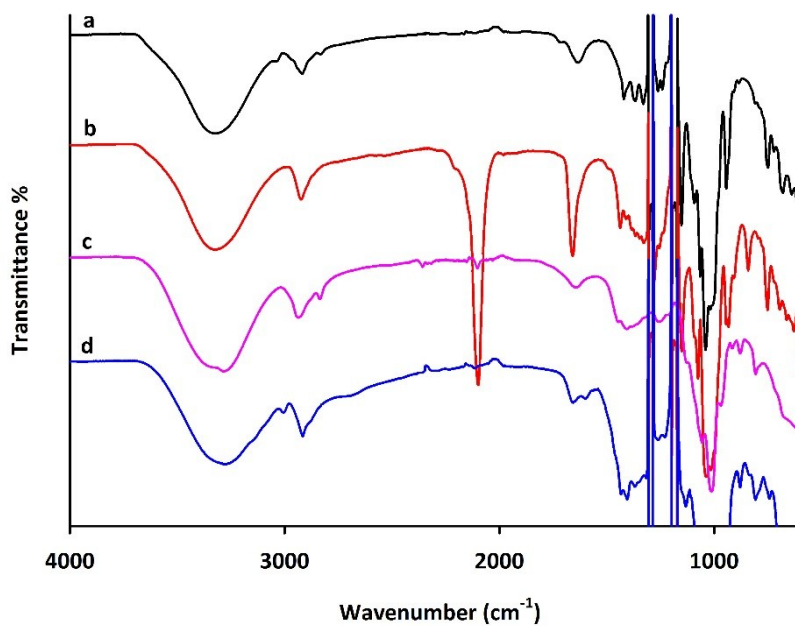

**Figure S9.** FTIR spectra of (a)  $\beta$ -CD-(Br)<sub>7</sub> (b)  $\beta$ -CD-(N<sub>3</sub>)<sub>7</sub> (c) 1-(2'-Propargyl) D-Mannose and (d)  $\beta$ -CD-(Mannose)<sub>7</sub> (**CD**<sub>7</sub>).

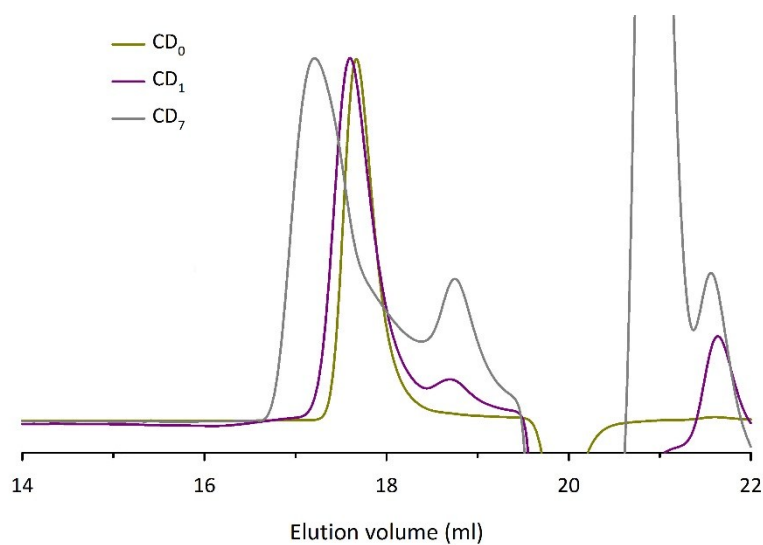

**Figure S10.** SEC traces of  $\beta$ -CD (**CD**<sub>0</sub>),  $\beta$ -CD-mannose (**CD**<sub>1</sub>), and  $\beta$ -CD-(mannose)<sub>7</sub> (**CD**<sub>7</sub>) using RI detector in DMF at 50 °C.

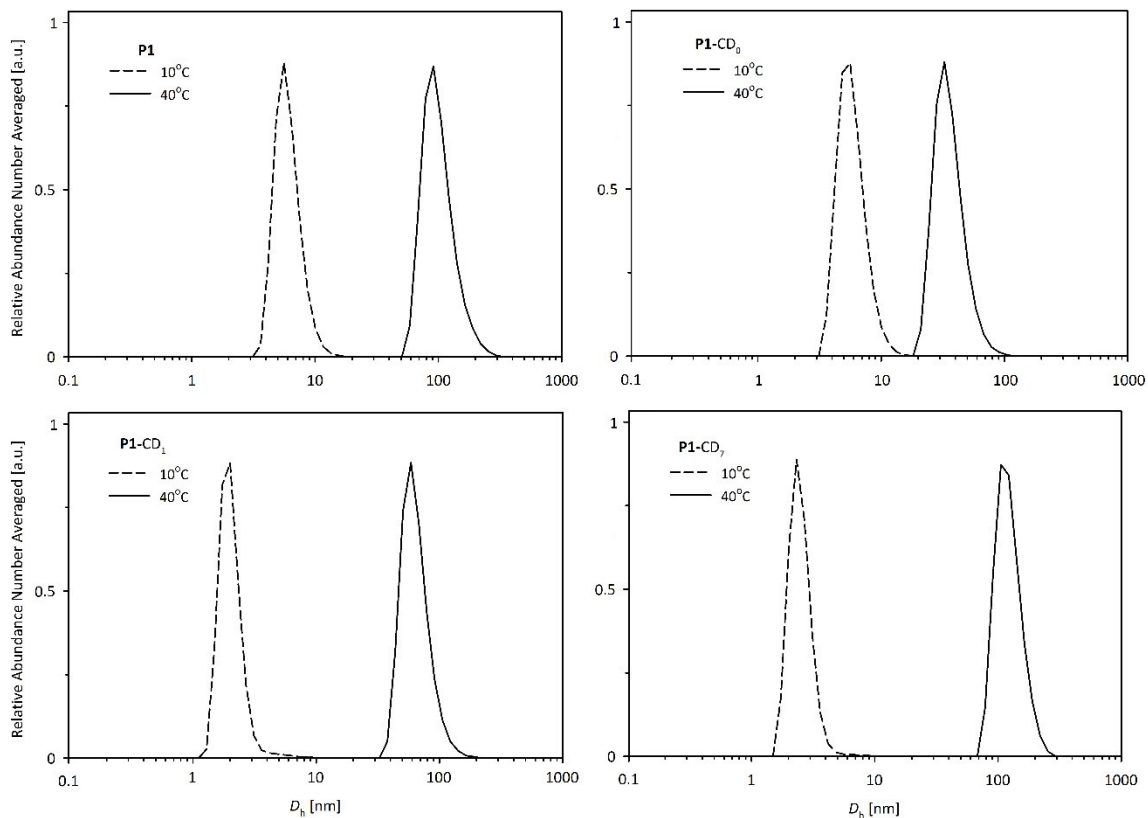

**Figure S11.** Comparison of the number average particle size distributions obtained from DLS measurements at  $1 \text{ mg.mL}^{-1}$ . The control samples of adamantyl functionalized building block **P1** and its complexes with  $\beta$ -CD derivatives at  $10^\circ\text{C}$  and  $40^\circ\text{C}$ , respectively.

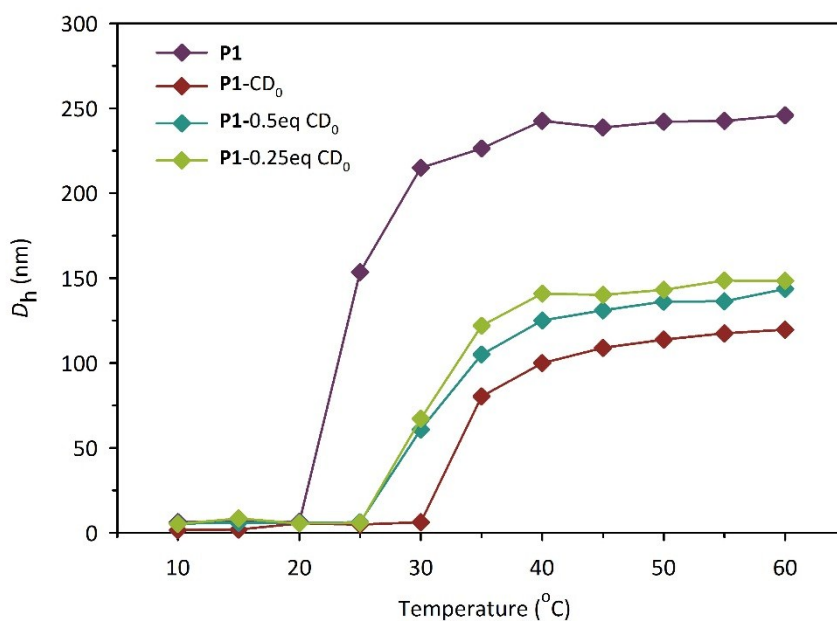

**Figure S12.** Temperature responsive behavior of adamantyl functional building block (**P1**) and its complexes with different amount of  $\beta$ -CD ( $\text{CD}_0$ ) at  $1 \text{ mg.mL}^{-1}$  in  $\text{H}_2\text{O}$ .

**Table S1.** Experimental conditions used for the preparation of the triblock copolymers in 1,4-dioxane at 65°C with AIBN as initiator.

| run                                                             | P1    |       |        |       |        |
|-----------------------------------------------------------------|-------|-------|--------|-------|--------|
|                                                                 | 1     |       | 2      | 3     |        |
| cycles                                                          |       |       |        |       |        |
| monomer                                                         | DMA   | Adac  | NIPAM  | DMA   | Adac   |
| DP <sub>targeted</sub>                                          | 8     | 2     | 20     | 8     | 2      |
| m <sub>monomer added</sub> (g)                                  | 0.481 | 0.267 | 1.370  | 0.481 | 0.267  |
| m <sub>CTA added</sub> (mg)                                     | 255.0 |       | -      |       | -      |
| m <sub>AIBN added</sub> (mg)                                    | 0.765 |       | 0.619  |       | 0.619  |
| V <sub>dioxane added</sub> (mL)                                 | 5.560 |       | 5.940  |       | 2.734  |
| V <sub>total</sub> <sup>[a]</sup> (mL)                          | 6.060 |       | 12.000 |       | 15.150 |
| m <sub>AIBN total</sub> <sup>[b]</sup> (mg)                     | 0.765 |       | 0.765  |       | 0.765  |
| [AIBN] <sub>0</sub> (x10 <sup>3</sup> ) (mmol.L <sup>-1</sup> ) | 7.69  |       | 3.88   |       | 3.08   |
| [M] <sub>0</sub> (mol.L <sup>-1</sup> )                         | 1.00  |       | 1.00   |       | 0.4    |
| [CTA] <sub>0</sub> /[AIBN] <sub>0</sub>                         | 130   |       | 130    |       | 130    |

[a] represent the sum of the volume of the solvent added + volume of the monomer added + V<sub>total</sub> previous block [b] represent the total weight of AIBN at time t<sub>0</sub> considering the weight of AIBN added (m<sub>AIBN added</sub>) + the weight of AIBN remaining (m<sub>AIBN remaining</sub>) from the previous block after precised time (m<sub>AIBN remaining</sub> = m<sub>AIBN total</sub> × 2f e<sup>-k<sub>d</sub>t</sup> × (1-f<sub>c</sub>/2) with f=0.5, f<sub>c</sub>=0, k<sub>d</sub>= 1.92 10<sup>-5</sup>s<sup>-1</sup>)

| Run | Structure                                    | Cycle | Reac. time (h) | Conversion <sup>a</sup> (%) |      |       | M <sub>n,th</sub> <sup>b</sup> (g mol <sup>-1</sup> ) | M <sub>n,SEC</sub> <sup>c</sup> (g mol <sup>-1</sup> ) | PDI  |
|-----|----------------------------------------------|-------|----------------|-----------------------------|------|-------|-------------------------------------------------------|--------------------------------------------------------|------|
|     |                                              |       |                | DMA                         | Adac | NIPAM |                                                       |                                                        |      |
| P1  | (PDMA <sub>8</sub> -PAdac <sub>2</sub> )-b-  | 1     | 6              | 95                          | 93   | -     | 1580                                                  | 774                                                    | 1.19 |
|     | PNIPAM <sub>20</sub> -b-(PDMA <sub>8</sub> - | 2     | 5              | -                           | -    | 93    | 3680                                                  | 2600                                                   | 1.27 |
|     | PAdac <sub>2</sub> )                         | 3     | 9              | 95                          | 92   | -     | 4840                                                  | 3130                                                   | 1.30 |

<sup>a</sup>Determined by gas chromatography; <sup>b</sup>M<sub>n,th</sub> = [M]<sub>0</sub> × p × M<sub>M</sub> / [CTA]<sub>0</sub> + M<sub>CTA</sub>; <sup>c</sup>Determined by the refractive index detector in size exclusion chromatography running in DMF with PMMA used as molecular weight standards.

**Table S2.** Characterisation of the triblock copolymers.

**Table S3.** Molecular weight results of adamantyl functionalized building block P1 and its complexes with CD derivatives after waiting enough time for inclusion complexation.

| run | M <sub>p,SEC</sub> <sup>[a]</sup> (g mol <sup>-1</sup> ) | M <sub>n,SEC</sub> (g mol <sup>-1</sup> ) | M <sub>w,SEC</sub> (g mol <sup>-1</sup> ) |
|-----|----------------------------------------------------------|-------------------------------------------|-------------------------------------------|
| P1  | 5180                                                     | 3785                                      | 4980                                      |

|                          |      |      |      |
|--------------------------|------|------|------|
| <b>P1-CD<sub>0</sub></b> | 3620 | 3160 | 3950 |
| <b>P1-CD<sub>1</sub></b> | 3975 | 2800 | 4110 |
| <b>P1-CD<sub>7</sub></b> | 5450 | 2770 | 4450 |

---

[a] Determined by SEC/RI in DMF with PMMA used as molecular weight standards.

## References.

1. Roy, B., Mukhopadhyay, B., *Tetrahedron Lett.* **48**, 3783–3787 (2007).
2. Amajjahe, S., Choi, S., Munteanu, M., Ritter, H., *Angew. Chem., Int. Ed.* **47**, 3435–3437 (2008).
3. Zhang, Q., Su, L., Collins, J., Chen, G., Wallis, R., Mitchell, D. A., Haddleton, D. M., Becer, C. R., *J. Am. Chem. Soc.* **136**, 4325–4332 (2014).
4. Zhang, Q., Slavin, S., Jones, M. W., Haddleton A. J., Haddleton, D. M., *Polym. Chem.* **3**, 1016–1023 (2012).
